# Supplementary figures and images for: Arf6 anchors Cdr2 nodes at the cell cortex to control cell size at division
Source: PubMed Central journal article supplement — J Cell Biol. 2021 Dec 27;221(2):e202109152. doi: 10.1083/jcb.202109152 (PMC8931934; doi:10.1083/jcb.202109152), 2021-12-27

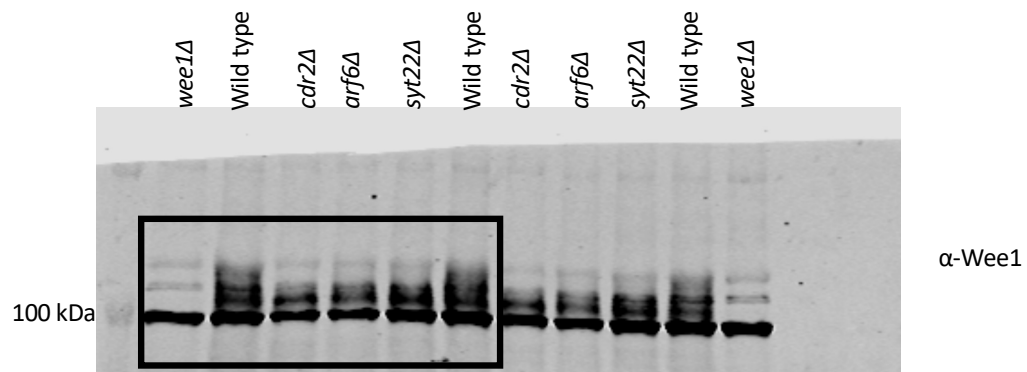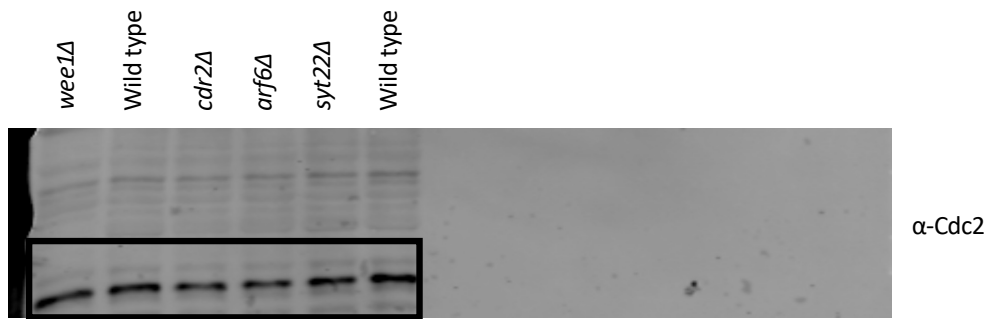

Supplement: JCB_202109152_SourceDataF1.pdf [file JCB_202109152_SourceDataF1.pdf]
